# Supplementary material for: Celiac disease T-cell epitopes from gamma-gliadins: immunoreactivity depends on the genome of origin, transcript frequency, and flanking protein variation
Source: PubMed Central journal article supplement (PMC3469346; doi:10.1186/1471-2164-13-277), 2012-06-22
Supplement: 1471-2164-13-277-S2.pdf [file 1471-2164-13-277-S2.pdf]

|                |                                   | Group        | %                                             |              |                                               |              |                                                                          |               |               |                                        |    |    |
|----------------|-----------------------------------|--------------|-----------------------------------------------|--------------|-----------------------------------------------|--------------|--------------------------------------------------------------------------|---------------|---------------|----------------------------------------|----|----|
| <b>Gli-A1</b>  |                                   |              |                                               |              |                                               |              |                                                                          |               |               |                                        |    |    |
| QPQQQFFPQP     | $\gamma$ VIIb/ $\gamma$ -VI       | QPPQPPFPQPPQ | $\gamma$ VIIb/ $\gamma$ -VI                   | QPPQPPFPQPPQ | $\gamma$ VIIb                                 | QPPQPPFPQPPQ | Glia- $\gamma$ 2a/ $\gamma$ VIIb                                         | $\gamma$ VIIb | QPPQPPFPQPPQ  | $\gamma$ VIIb/ $\gamma$ -I (variant 3) | 6  | 16 |
| Q-----         |                                   |              |                                               |              |                                               |              | Glia- $\gamma$ 2a/ $\gamma$ VIIb                                         | $\gamma$ VIIb |               | $\gamma$ VIIb/ $\gamma$ -I (variant 3) | 6  | 1  |
| #PQQQFFPQPQPPQ |                                   | QPPQPPFPQPPQ | $\gamma$ VIIb/ $\gamma$ -VI                   | QPPQPPFPQPPQ | $\gamma$ VIIb                                 | QPPQPPFPQPPQ | Glia- $\gamma$ 2a/ $\gamma$ VIIb                                         |               | QPPQPPFPQPPQ  | $\gamma$ VIIb/ $\gamma$ -I (variant 3) | 6  | 3  |
| #PQQQFFPQPQPPQ |                                   | QPPQPPFPQPPQ |                                               | QPPQPPFPQPPQ | $\gamma$ VIIb                                 | QPPQPPFPQPPQ | Glia- $\gamma$ 2a/ $\gamma$ VIIb                                         | $\gamma$ VIIb | $\gamma$ VIIb | $\gamma$ -I (variant 1)                | 7  | 4  |
| G-----         |                                   |              |                                               |              |                                               |              | $\gamma$ VIIb                                                            | $\gamma$ VIIb | $\gamma$ VIIb | $\gamma$ -I (variant 1)                | 7  | 1  |
| <b>Gli-B1</b>  |                                   |              |                                               |              |                                               |              |                                                                          |               |               |                                        |    |    |
| LQP            | $\gamma$ -VI/Glia- $\gamma$ 2a    | QPPQPPFPQPPQ | $\gamma$ VIIb/ $\gamma$ -VI/Glia- $\gamma$ 2a | QPPQPPFPQPPQ | $\gamma$ VIIb                                 | QPPQPPFPQPPQ | $\gamma$ -VIIa                                                           | QPPQPPFPQPPQ  | QPPQPPFPQPPQ  | $\gamma$ -I (variant 10)               | 8  | 3  |
| #FPQQP         |                                   | QLP          | Glia- $\gamma$ 2a / $\gamma$ VIIb             | QPPQPPFPQPPQ | $\gamma$ VIIb                                 | QPPQPPFPQPPQ |                                                                          | QPPQPPFPQPPQ  | QPPQPPFPQPPQ  | $\gamma$ -I (variant 1)                | 3  | 6  |
| #QPQQFFPQPQPPQ |                                   | QLP          | Glia- $\gamma$ 2a / $\gamma$ VIIb             | QPPQPPFPQPPQ | $\gamma$ VIIb                                 | QPPQPPFPQPPQ | $\gamma$ VIIb/ $\gamma$ -VIIa                                            | QPPQPPFPQPPQ  | QPPQPPFPQPPQ  | $\gamma$ -I (variant 9)                | 5  | 1  |
| #-QQP          |                                   | QLP          | Glia- $\gamma$ 2a / $\gamma$ VIIb             | QPPQPPFPQPPQ | $\gamma$ VIIb                                 | QPPQPPFPQPPQ | $\gamma$ VIIb/ $\gamma$ -VIIa                                            | QPPQPPFPQPPQ  | QPPQPPFPQPPQ  | $\gamma$ -I (variant 4)                | 5  | 6  |
| Q-----         |                                   |              |                                               |              | $\gamma$ VIIb                                 | QPPQPPFPQPPQ | $\gamma$ VIIb/ $\gamma$ -VIIa                                            | QPPQPPFPQPPQ  | QPPQPPFPQPPQ  | $\gamma$ -I (variant 2)                | 5  | 4  |
| Q-----         |                                   |              |                                               |              | $\gamma$ VIIb                                 | QPPQPPFPQPPQ | $\gamma$ VIIb/ $\gamma$ -VIIa                                            | QPPQPPFPQPPQ  | QPPQPPFPQPPQ  | $\gamma$ -I (variant 4)                | 5  | 5  |
| <b>Gli-D1</b>  |                                   |              |                                               |              |                                               |              |                                                                          |               |               |                                        |    |    |
| F LQPQQA       | Glia- $\gamma$ 2a / $\gamma$ VIIb | QPPQPPFPQPPQ | $\gamma$ VIIb/ $\gamma$ -VI/Glia- $\gamma$ 2a | QPPQPPFPQPPQ | $\gamma$ VIIb/ $\gamma$ -VI/Glia- $\gamma$ 2a | QPPQPPFPQPPQ | $\gamma$ VIIb                                                            | QPPQPPFPQPPQ  | QPPQPPFPQPPQ  | $\gamma$ -I, variant 11                | 9  | 1  |
| F LQ-----      |                                   | QPPQPPFPQPPQ | $\gamma$ VIIb/ $\gamma$ -VI/Glia- $\gamma$ 2a | QPPQPPFPQPPQ | $\gamma$ VIIb/ $\gamma$ -VI/Glia- $\gamma$ 2a | QPPQPPFPQPPQ | $\gamma$ VIIb                                                            | QPPQPPFPQPPQ  | QPPQPPFPQPPQ  | $\gamma$ -I, variant 11                | 9  | 30 |
| FPQ-----       |                                   |              |                                               |              |                                               |              |                                                                          |               | QPPQPPFPQPPQ  | $\gamma$ -I, variant 10                | 9  | 2  |
| Q-----         |                                   |              |                                               |              |                                               |              | $\gamma$ VIIb                                                            | $\gamma$ VIIb |               | $\gamma$ -I, variant 10                | 9  | 8  |
|                |                                   |              |                                               |              |                                               |              | [26-mer/ $\gamma$ VI / $\gamma$ III / Glia- $\gamma$ 2b / $\gamma$ VIIb] | $\gamma$ -IV  |               | $\gamma$ -1, variant 12                | 10 | 9  |
